# Supplementary material for: Turn-on signal fluorescence sensor based on DNA derived bio-dots/polydopamine nanoparticles for the detection of glutathione
Source: Royal Society of Chemistry journal article supplement (doi:10.1039/d1ra08107a), 2022-01-01
Supplement: d1ra08107a1.pdf [file d1ra08107a1.pdf]

## Supporting information

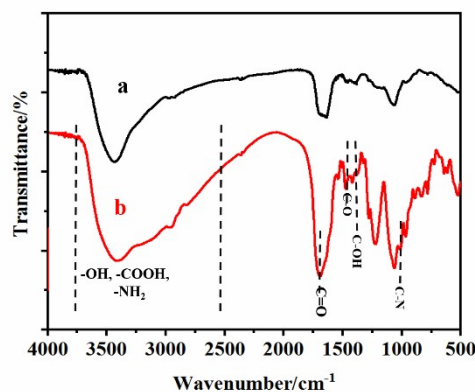

Figure S1. FT-IR spectra of double-stranded DNA (a) and DNA bio-dots (b).

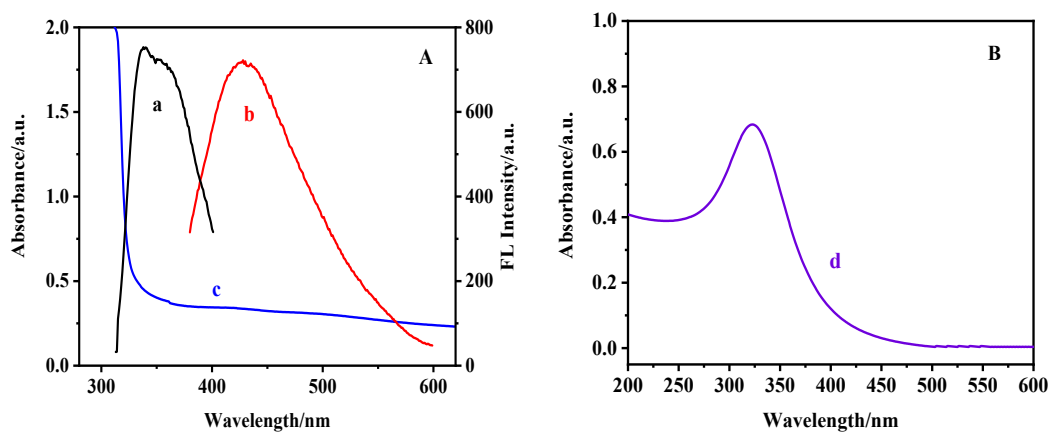

Figure S2. (A) Excitation (a) and emission spectra (b) of DNA bio-dots; absorption spectrum of PDA (c); (B) absorption spectrum of DNA bio-dots (d).

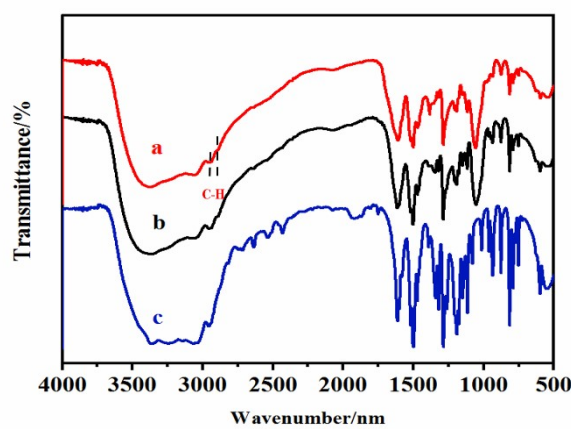

Figure S3. FT-IR spectra of PDA (a), DNA bio-dots @PDA (b) and DA(c).
